# Supplementary material for: Ascorbic acid enhanced ferrous/persulfate system for degradation of tetracycline contaminated groundwater
Source: Royal Society of Chemistry journal article supplement (doi:10.1039/d2ra04694f), 2022-01-01
Supplement: d2ra04694f1.pdf [file d2ra04694f1.pdf]

# Supplementary Materials

## **Ascorbic acid enhanced ferrous/persulfate system for degradation of tetracycline contaminated groundwater**

*Hengyi Wang<sup>a,b</sup>, Liyang Zhao<sup>a,b</sup>, Qian Li<sup>a,b</sup>, Xixiang Liu<sup>a,b,c\*</sup>, Liying Liang<sup>a,b</sup>, Jianmei Cen<sup>a,b</sup>, Yan Liu<sup>a,b</sup>*

*<sup>a</sup>School of Materials and Environment, Guangxi Minzu University, Nanning 530006, China.*

*<sup>b</sup>Research Center for Soil and Groundwater Environment, Guangxi Minzu University, Nanning 530006, China.*

*<sup>c</sup>Guangxi Research Institute of Chemical Industry Co., Ltd., Nanning 530001, China.*

*\*Corresponding Author. Email: liuwx200208@163.com (X.X. Liu)*

Supplementary materials includes a total of 4 figures and 2 tables.

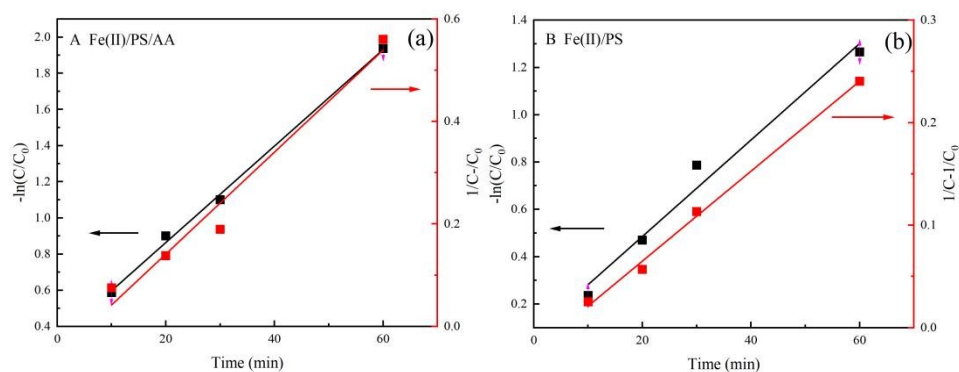

Fig. S1 Comparison of system dynamics between Fe(II)/PS/AA and Fe(II)/PS. Experimental conditions: TC dosage=10 mg L<sup>-1</sup>, Fe(II) dosage=0.01 mM, PS dosage=0.8 mM, AA dosage=0.05mM, initial pH was not adjusted.

Table S1 Kinetics constants of TC degradation by Fe(II)/PS/AA and Fe(II)/PS system.

| Reaction system | Kinetic series      | The fitted reaction rate equation | $K_{app1}(\text{min}^{-1})$<br>$K_{app2}(\text{L mg}^{-1} \text{min}^{-1})$ | $R^2$ |
|-----------------|---------------------|-----------------------------------|-----------------------------------------------------------------------------|-------|
| Fe(II)/PS/AA    | Pseudo-first order  | $-\ln(C/C_0)=0.3306+0.0266t$      | 0.0266                                                                      | 0.996 |
|                 | Pseudo-second order | $1/C-1/C_0=-0.0576+0.0099t$       | 0.0099                                                                      | 0.955 |
| Fe(II)/PS       | Pseudo-first order  | $-\ln(C/C_0)=-0.0228+0.0043t$     | 0.0043                                                                      | 0.994 |
|                 | Pseudo-second order | $1/C-1/C_0=0.0778+0.0203t$        | 0.0203                                                                      | 0.966 |

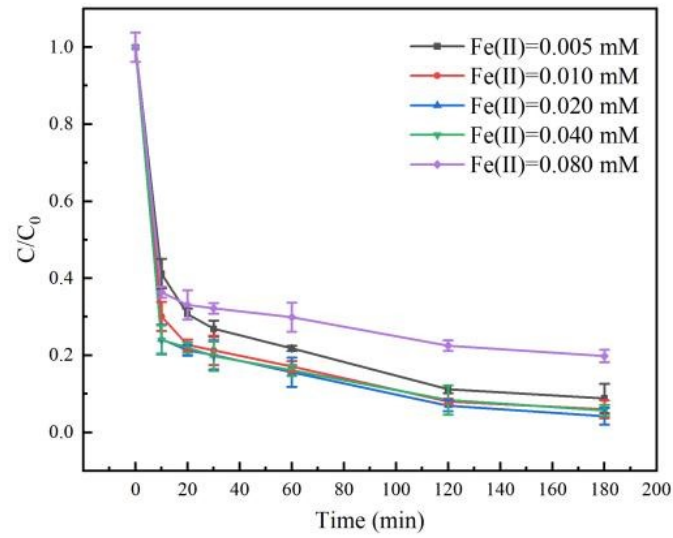

Fig. S2 Effect of Fe(II) dosage of the Fe(II)/PS/AA system for the removal of TC. Experimental conditions: TC dosage=10 mg L<sup>-1</sup>, Fe(II) dosage=0.01 mM, PS dosage=0.8 mM, AA dosage=0.05 mM, initial pH was not adjusted.

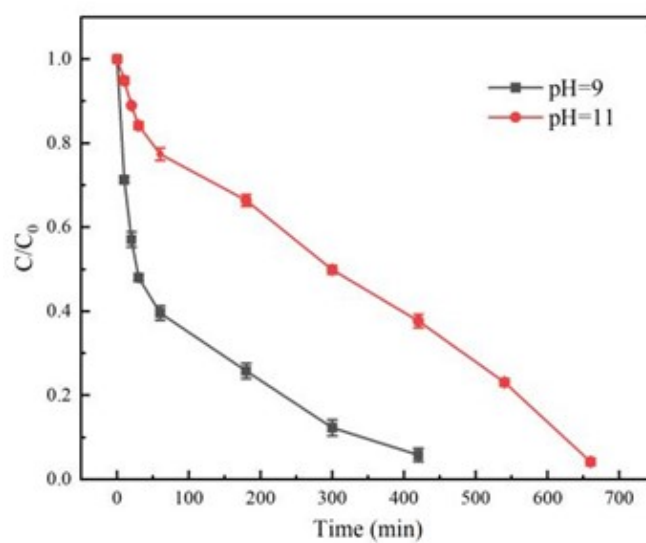

Fig. S3 Effect of pH on degradation of TC in Fe(II)/PS/AA system. Experimental conditions: TC dosage=10 mg L<sup>-1</sup>, Fe(II) dosage=0.01 mM, PS dosage=0.8 mM, AA dosage=0.05 mM.

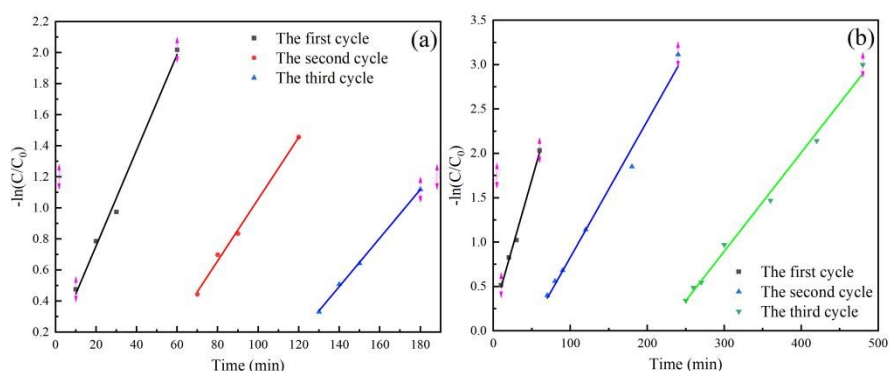

Fig. S4 Reusability evaluation of Fe(II). Experimental conditions: TC dosage=10 mg L<sup>-1</sup>, Fe(II) dosage=0.01 mM, PS dosage=0.8 mM, AA dosage=0.05mM, initial pH was not adjusted.

Table S2 Kinetics constants of TC degradation by Fe(II)/PS/AA system in the experiment of Fe(II) Reusability evaluation.

|     | Cycle period | Pseudo-first-order kinetics fitting reaction rate equation | $K_{app}(\text{min}^{-1})$ | $R^2$ |
|-----|--------------|------------------------------------------------------------|----------------------------|-------|
| (a) | First        | $-\ln(C/C_0)=0.1386+0.0308t$                               | 0.0308                     | 0.995 |
|     | Second       | $-\ln(C/C_0)=-0.9304+0.0198t$                              | 0.0198                     | 0.997 |
|     | Third        | $-\ln(C/C_0)=-1.6931+0.0156t$                              | 0.0156                     | 0.999 |
| (b) | First        | $-\ln(C/C_0)=0.1901+0.0303t$                               | 0.0303                     | 0.996 |
|     | Second       | $-\ln(C/C_0)=-0.7075+0.0153t$                              | 0.0153                     | 0.994 |
|     | Third        | $-\ln(C/C_0)=-2.4410+0.0111t$                              | 0.0111                     | 0.997 |
